# Supplementary material for: Application of 2D-MoO3 nano-flakes in organic light emitting diodes: effect of semiconductor to metal transition with irradiation
Source: Royal Society of Chemistry journal article supplement (doi:10.1039/c4ra12430h), 2014-12-15
Supplement: c4ra12430h1.pdf [file c4ra12430h1.pdf]

## Supporting Information

### Application of 2D-MoO<sub>3</sub> nano-flakes in Organic Light Emitting Diodes: Effect of Semiconductor to Metal Transition with Irradiation

#### 1. AFM Images for 2D-MoO<sub>3</sub> nano-flakes deposited over ITO coated substrates

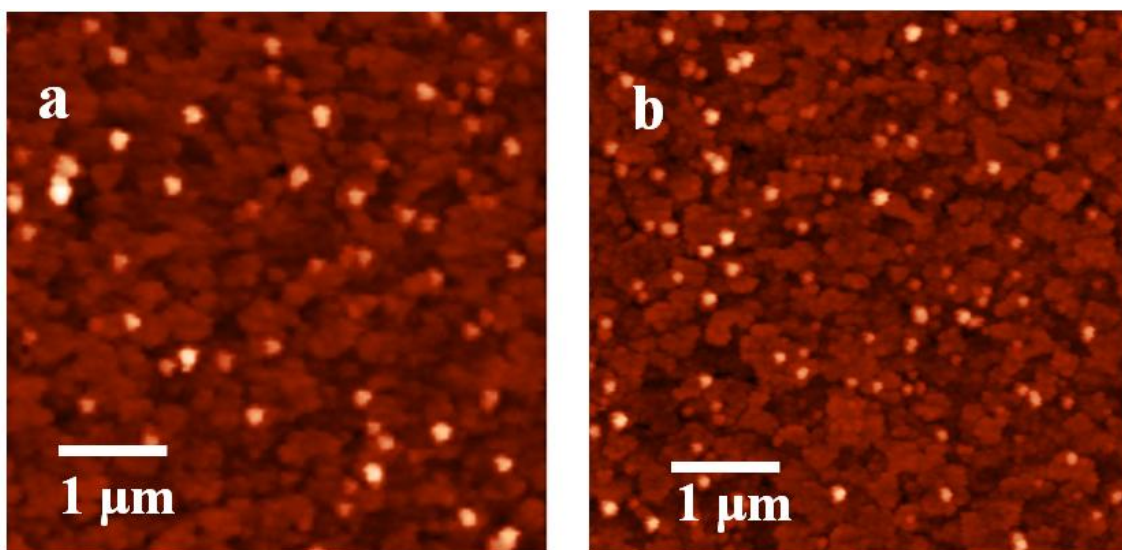

Fig. S1: AFM images for one time (a) and two time (b) coating of 2D-MoO<sub>3</sub> nano-flakes over ITO coated substrates.

## 2. Kelvin probe measurements on 2D-MoO<sub>3</sub> nano-flakes deposited over ITO coated substrates

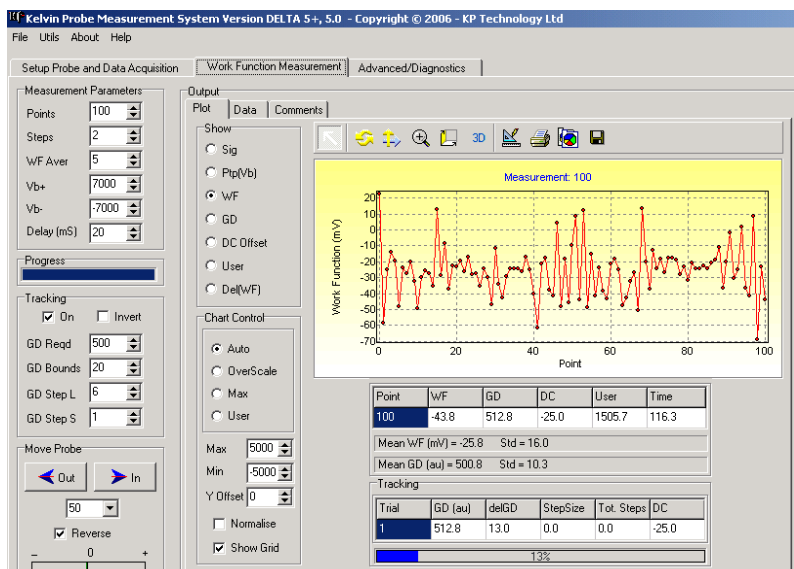

(a)

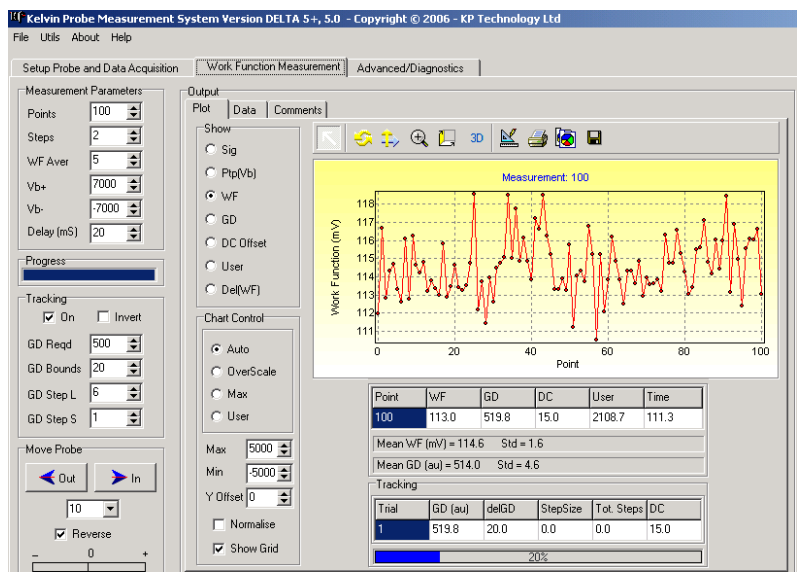

(b)

Fig. S2: Signals obtained from Kelvin probe microscopy for (a) bare ITO coated substrate and (b) 2D-MoO<sub>3</sub> nano-flakes with  $t_{\text{irr}} = 120$  min deposited substrates.

### 3. EL Spectrum of OLEDs without and with nano-flakes as HIL

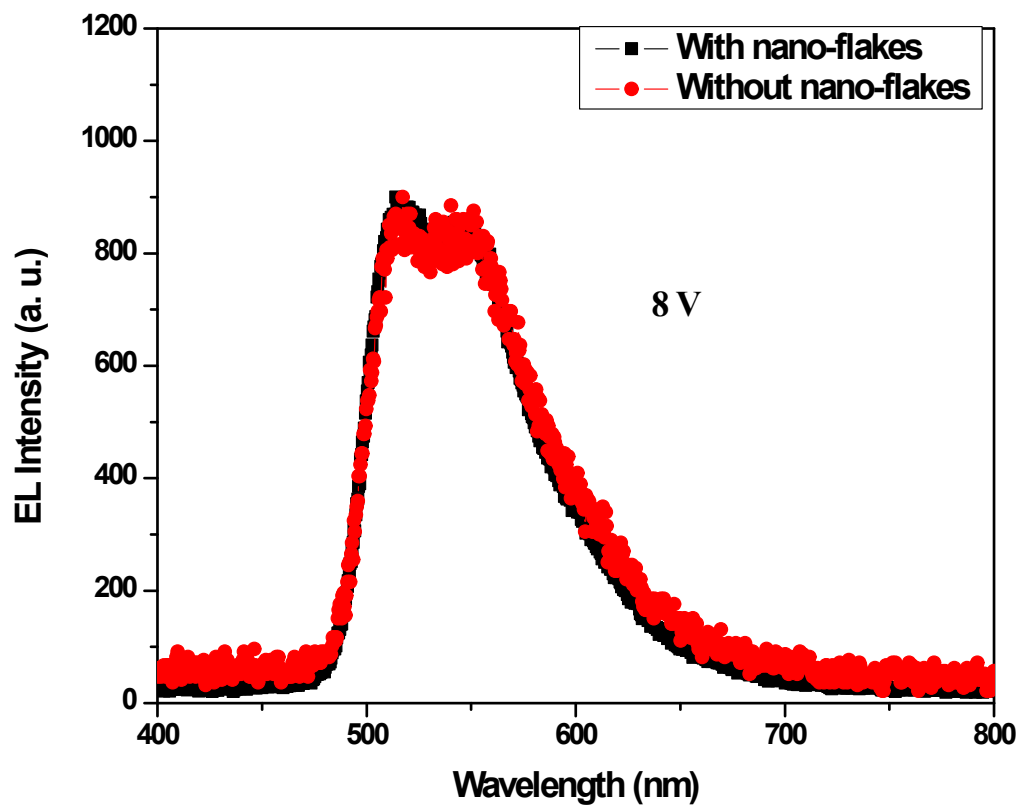

Fig. S3: EL spectrum of OLEDs without and with nano-flakes as HIL.
